# Supplementary material for: Cold and vibration for children undergoing needle‐related procedures: A non‐inferiority randomized clinical trial
Source: PubMed Central journal article supplement — Paediatr Neonatal Pain. 2024 Jun 22;6(4):164–73. doi: 10.1002/pne2.12125 (PMC11645969; doi:10.1002/pne2.12125), 2024-06-22
Supplement: PNE2-6-164-s001.pdf [file PNE2-6-164-s001.pdf]

Supplemental Table 1. - Baseline sociodemographic and clinical characteristics of participants – Per-Protocol population

| <b>Participants' characteristics</b>                                     | <b>Cold vibrating device</b><br>(n = 172) | <b>Topical anesthetic</b><br>(n = 174) | <b>Total</b><br>(n = 346) |
|--------------------------------------------------------------------------|-------------------------------------------|----------------------------------------|---------------------------|
| <b>Age (year) - Mean (SD)</b>                                            | 9.8 ± 3.9                                 | 10.0 ± 4.0                             | 9.9 (3.9)                 |
| <b>Sex - n (%)</b>                                                       |                                           |                                        |                           |
| Girls                                                                    | 83 (51.9)                                 | 88 (52.4)                              | 177 (52.1)                |
| Boys                                                                     | 77 (48.1)                                 | 80 (47.6)                              | 157 (47.9)                |
| <b>Types of needle-related procedure - n (%)</b>                         |                                           |                                        |                           |
| Venipuncture                                                             | 115 (72.8)                                | 129 (76.8)                             | 244 (74.9)                |
| IV catheter                                                              | 43 (27.2)                                 | 39 (23.2)                              | 82 (25.1)                 |
| <b>Previous experience(s) with needle-related procedure(s) † - n (%)</b> |                                           |                                        |                           |
| Yes                                                                      | 102 (64.2)                                | 107 (64.1)                             | 209 (64.1)                |
| No                                                                       | 57 (35.8)                                 | 60 (35.9)                              | 117 (35.9)                |
| <b>Analgesia in the last 4 hours - n (%)</b>                             |                                           |                                        |                           |
| Yes                                                                      | 60 (37.7)                                 | 60 (36.1)                              | 120 (36.9)                |
| No                                                                       | 99 (62.3)                                 | 104 (62.7)                             | 203 (62.5)                |
| Don't know                                                               | 0 ( 0.0)                                  | 2 ( 1.2)                               | 2 ( 0.6)                  |
| <b>Site of the needle-related procedure - n (%)</b>                      |                                           |                                        |                           |
| Antecubital                                                              | 121 (76.1)                                | 130 (78.3)                             | 251 (77.2)                |
| Hand                                                                     | 26 (16.4)                                 | 33 (19.9)                              | 59 (18.2)                 |
| Wrist                                                                    | 11 ( 6.9)                                 | 2 ( 1.2)                               | 13 ( 4.0)                 |
| Other                                                                    | 1 ( 0.6)                                  | 1 ( 0.6)                               | 2 ( 0.6)                  |
| <b>Position during needle-related procedure - n (%)</b>                  |                                           |                                        |                           |
| Dorsal decubitus                                                         | 90 (56.3)                                 | 70 (42.2)                              | 160 (49.1)                |
| Sitting alone                                                            | 54 (33.8)                                 | 68 (41.9)                              | 122 (37.4)                |
| Sitting on parents                                                       | 11 ( 6.9)                                 | 20 (12.1)                              | 31 ( 9.5)                 |
| Dorsal decubitus with restraint                                          | 5 ( 3.1)                                  | 7 ( 4.2)                               | 12 ( 3.7)                 |
| Other                                                                    | 0 ( 0.0)                                  | 1 ( 0.6)                               | 1 ( 0.3)                  |
| <b>Non-pharmacological co-intervention - n (%)</b>                       |                                           |                                        |                           |
| Yes                                                                      | 29 (18.1)                                 | 32 (19.1)                              | 61 (18.6)                 |
| No                                                                       | 131 (81.9)                                | 134 (76.8)                             | 265 (80.8)                |
| <b>Pre-procedural pain (CAS) - Mean (SD)</b>                             | 2.9 (2.6)                                 | 2.6 (2.7)                              | 2.7 (2.6)                 |
| <b>Pre-procedural pain (FPS-R) - Mean (SD)</b>                           | 2.8 (2.7)                                 | 2.8 (3.0)                              | 2.8 (2.8)                 |
| <b>Pre-procedural distress (PBCL) - Mean (SD)</b>                        | 9.6 (3.5)                                 | 9.1 (2.5)                              | 9.3 (3.1)                 |
| <b>Pre-procedural distress (CFS) - Mean (SD)</b>                         | 1.7 (1.4)                                 | 1.5 (1.4)                              | 1.6 (1.4)                 |

**CAS** : Color Analogue Scale ; **FPS-R** : Faces Pain Scale - Revised ; **PBCL** : Procedure Behavioral Check List ; **CFS** : Children's Fear Scale

† Previous experience(s) with needle-related procedure(s) excluding vaccination related to the Quebec immunization program
